# Supplementary material for: Construction of an Sc-NiFe-LDH electrocatalyst for highly efficient electrooxidation of 5-hydroxymethylfurfural at industrial current density
Source: Royal Society of Chemistry journal article supplement (doi:10.1039/d4nr04389h), 2024-12-09
Supplement: d4nr04389h1.pdf [file d4nr04389h1.pdf]

## Supporting Information

### **Construction of Sc-NiFe-LDH electrocatalyst for highly efficient electrooxidation of 5-hydroxymethylfurfural at industrial current density**

Yufeng Wu<sup>1</sup>, Zhiyan Hou<sup>1</sup> and Changlong Wang<sup>1\*</sup>,

<sup>1</sup> Institute of Circular Economy, College of Materials Science and Engineering, Beijing University of Technology, Beijing 100124, P. R. China.

\* Author to whom correspondence should be addressed:

E-mail: clwang1987@126.com.

## Table of Contents

|                                                                                                                                             |    |
|---------------------------------------------------------------------------------------------------------------------------------------------|----|
| <b>1. Supplementary Figures</b> .....                                                                                                       | 4  |
| <b>Figure S1</b>   SEM image of NiFe-LDH (a) 1 $\mu$ m, (b) 500 nm.....                                                                     | 4  |
| <b>Figure S2</b>   The FDCA yield, FE and selectivity on Sc-NiFe-LDH at varied potentials in 10 mM HMF solution. ....                       | 5  |
| <b>Figure S3</b>   Current densities, charges vs. time curves of Sc-NiFe-LDH. ....                                                          | 6  |
| <b>Figure S4</b>   (a-e) The HPLC standard curves of HMF and corresponding products.....                                                    | 7  |
| <b>Figure S5</b>   CV curves of different electrodes in 1 M KOH with 10 mM HMF at different scan rates. (a) NiFe-LDH, (b) Sc-NiFe-LDH. .... | 8  |
| <b>Figure S6</b>   TEM image of the Sc-NiFe-LDH after six successive electrolysis cycles.....                                               | 9  |
| <b>Figure S7</b>   LSV curves for Sc-NiFe-LDH in 1 M KOH with and without 0.1 M Glucose. ...                                                | 10 |
| <b>Figure S8</b>   LSV curves for Sc-NiFe-LDH in 1 M KOH with and without 0.1 M Furfural. ...                                               | 11 |
| <b>Figure S9</b>   LSV curves for Sc-NiFe-LDH in 1 M KOH with and without 0.1 M Benzylalcohol. ....                                         | 12 |
| <b>Figure S10</b>   LSV curves for Sc-NiFe-LDH in 1 M KOH with and without 0.1 M Urea.....                                                  | 13 |
| <b>Figure S11</b>   LSV curves for Sc-NiFe-LDH in 1 M KOH with and without 0.1 M Ethanol. ...                                               | 14 |
| <b>Figure S12</b>   LSV curves for Sc-NiFe-LDH in 1 M KOH with and without 0.1 M Methanol. ....                                             | 15 |
| <b>Figure S13</b>   Two possible pathways for the oxidation of HMF to FDCA. ....                                                            | 16 |
| <b>Figure S14</b>   The equivalent circuit used for modeling the measured electrochemical response. ....                                    | 17 |
| <b>2. Supplementary Tables</b> .....                                                                                                        | 18 |

|                                                                                                                                            |    |
|--------------------------------------------------------------------------------------------------------------------------------------------|----|
| <b>Table S1</b>   Comparison of the catalytic performances of Sc-NiFe-LDH and known catalysts for the electrooxidation of 100 mM HMF ..... | 18 |
| <b>Table S2</b>   Comparison of FDCA yield with several electrochemical HMF catalysts reported recently. ....                              | 19 |
| <b>Table S3</b>   The resistance of each component for Sc-NiFe-LDH in 1 M KOH. ....                                                        | 22 |
| <b>Table S4</b>   The resistance of each component for Sc-NiFe-LDH in 1 M KOH with 10 M HMF. ....                                          | 22 |
| <b>Table S5</b>   The resistance of each component for NiFe-LDH in 1 M KOH.....                                                            | 23 |
| <b>Table S6</b>   The resistance of each component for NiFe-LDH in 1 M KOH with 10 M HMF. ....                                             | 23 |

## 1. Supplementary Figures

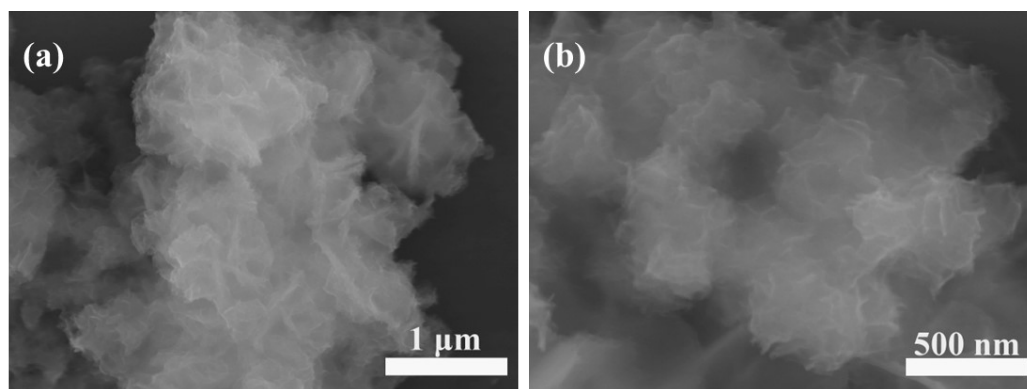

**Figure S1** | SEM image of NiFe-LDH (a) 1  $\mu\text{m}$ , (b) 500 nm.

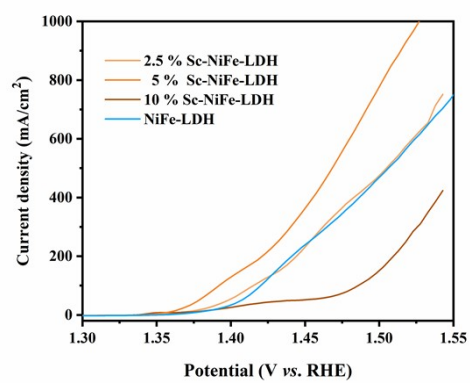

**Figure S2** | LSV of Sc-NiFe-LDH with different Sc contents in 1 M KOH with 10 mM HMF.

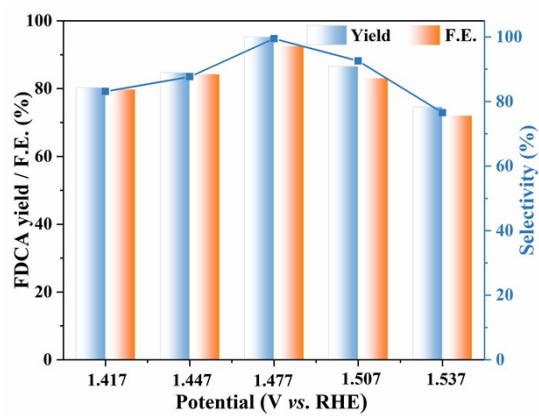

**Figure S3** | The FDCA yield, FE and selectivity on Sc-NiFe-LDH at varied potentials in 10 mM HMF solution.

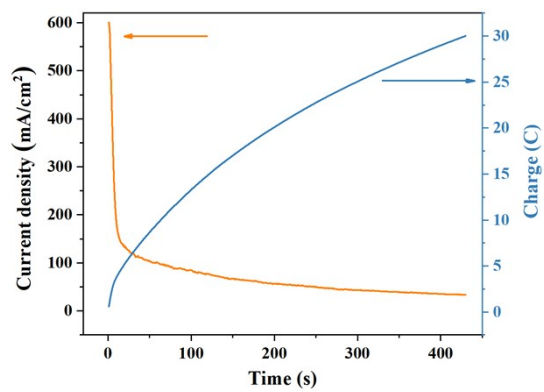

**Figure S4** | Current densities, charges vs. time curves of Sc-NiFe-LDH.

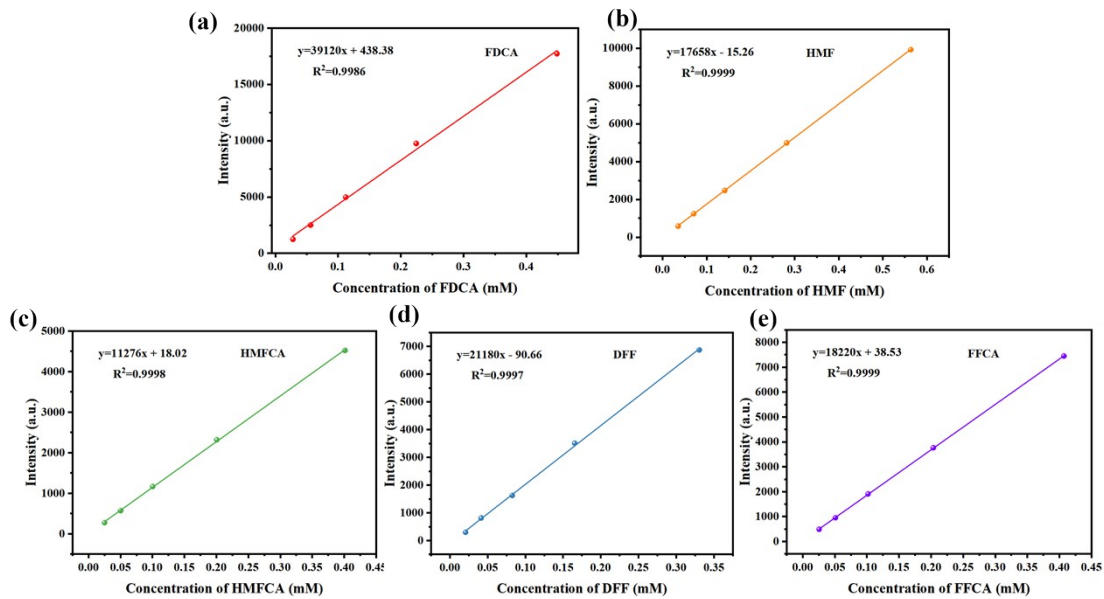

**Figure S5** | (a-e) The HPLC standard curves of HMF and corresponding products.



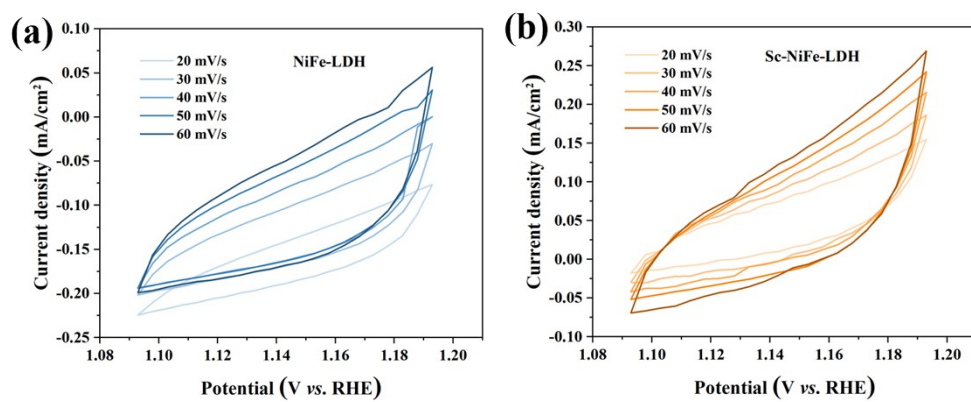

**Figure S6** | CV curves of different electrodes in 1 M KOH with 10 mM HMF at different scan rates. (a) NiFe-LDH, (b) Sc-NiFe-LDH.

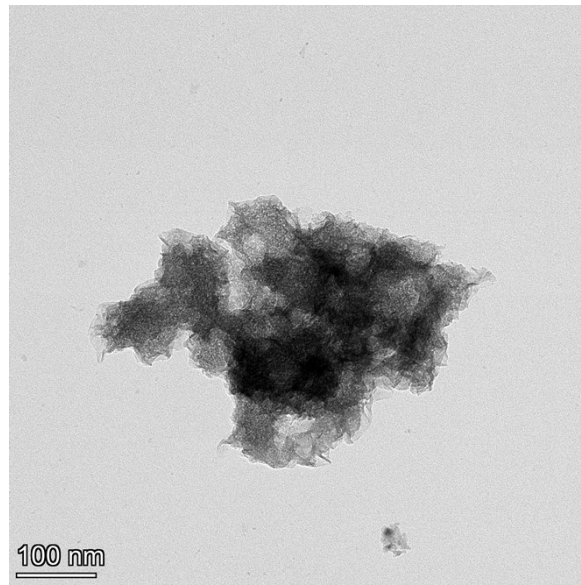

**Figure S7** | TEM image of the Sc-NiFe-LDH after six successive electrolysis cycles.

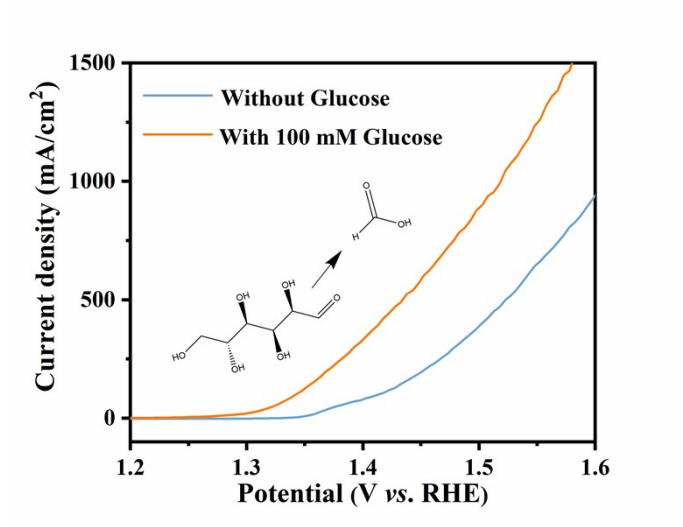

**Figure S8** | LSV curves for Sc-NiFe-LDH in 1 M KOH with and without 0.1 M Glucose.

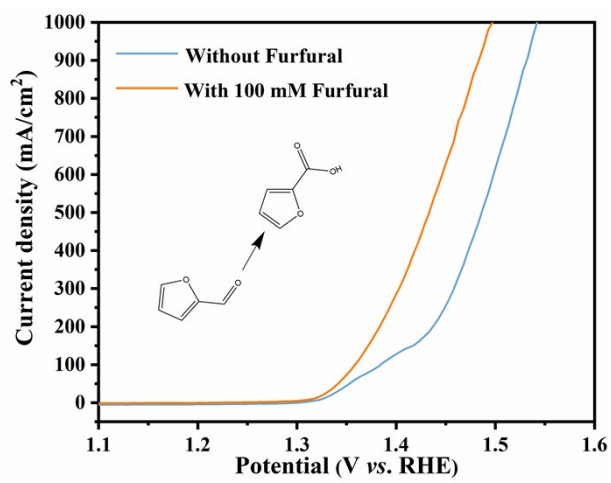

**Figure S9** | LSV curves for Sc-NiFe-LDH in 1 M KOH with and without 0.1 M Furfural.

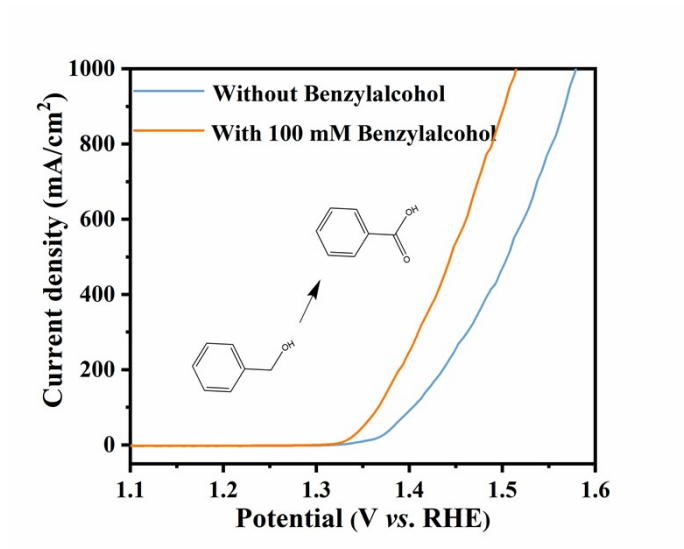

**Figure S10** | LSV curves for Sc-NiFe-LDH in 1 M KOH with and without 0.1 M Benzylalcohol.

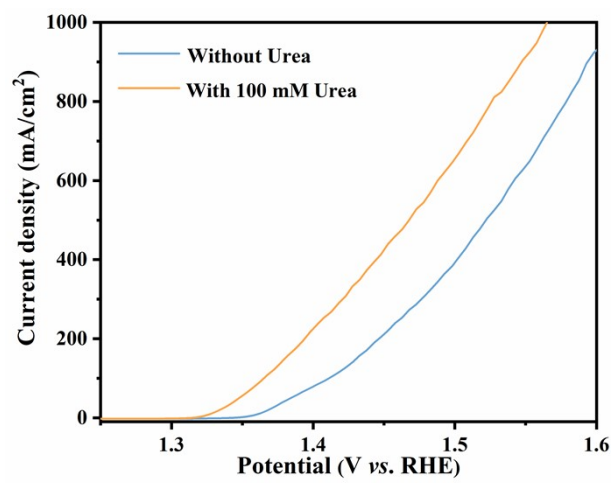

**Figure S11** | LSV curves for Sc-NiFe-LDH in 1 M KOH with and without 0.1 M Urea.

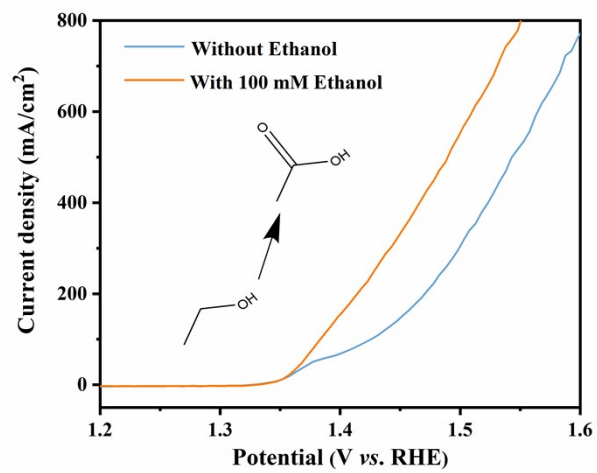

**Figure S12** | LSV curves for Sc-NiFe-LDH in 1 M KOH with and without 0.1 M Ethanol.

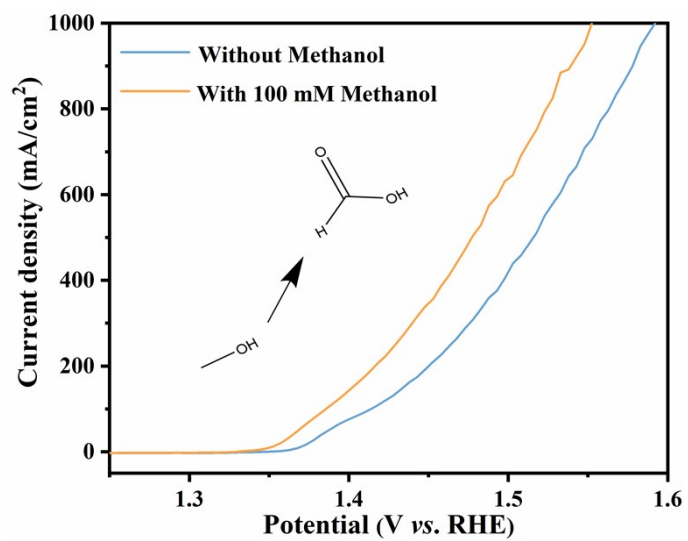

**Figure S13** | LSV curves for Sc-NiFe-LDH in 1 M KOH with and without 0.1 M Methanol.



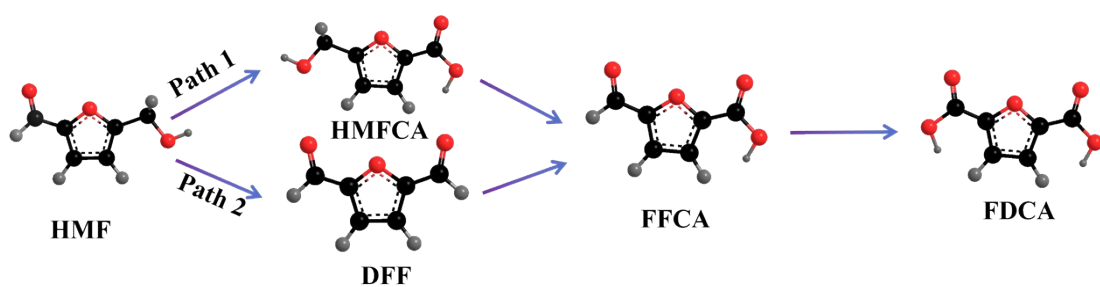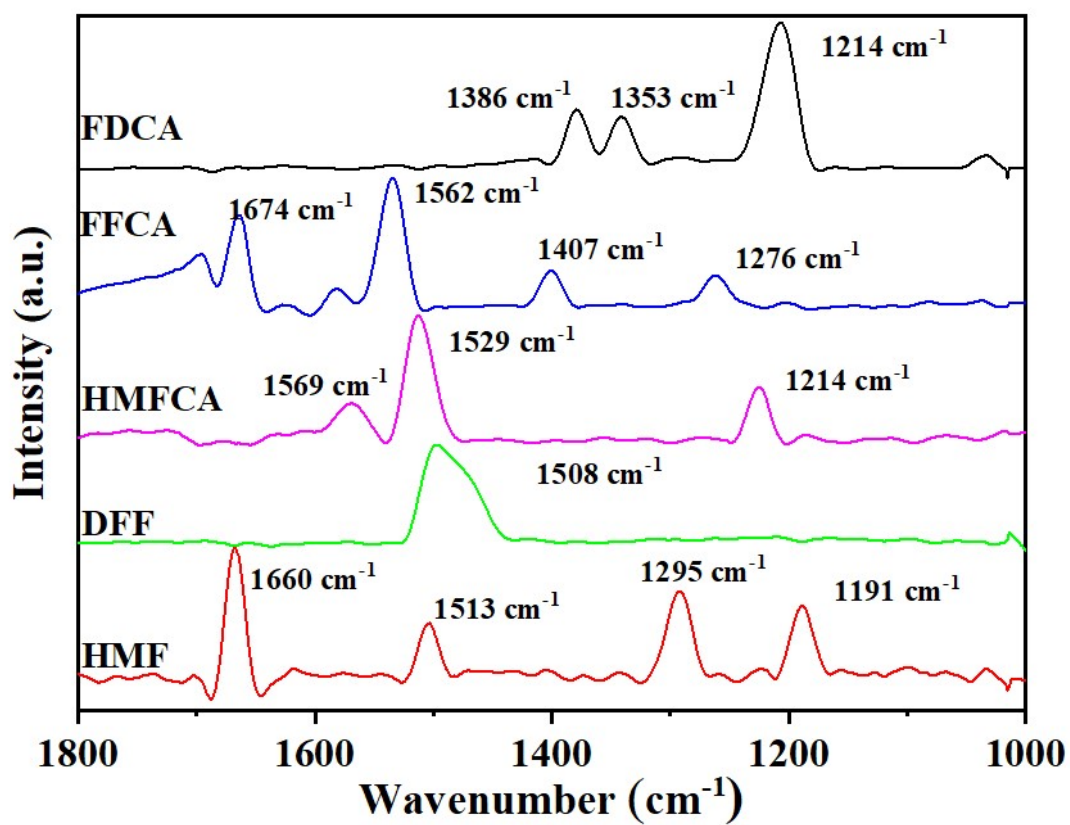

**Figure S14** | Two possible pathways for the oxidation of HMF to FDCA, and the FTIR of each pure product.

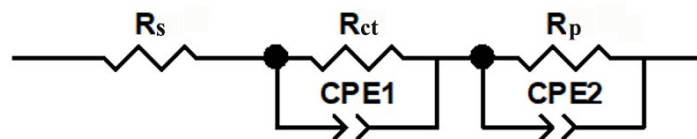

**Figure S15** | The equivalent circuit used for modeling the measured electrochemical response.

## 2. Supplementary Tables

**Table S1** | Comparison of the catalytic performances of Sc-NiFe-LDH and known catalysts for the electrooxidation of 100 mM HMF

| Catalysts     | HMF concentration (mM) | Yield (%) | E <sub>10</sub> (vs. RHE)/HMFOR | Current density at 1.50 V vs. RHE (mA/cm <sup>2</sup> ) | E <sub>50</sub> (vs. RHE)/HMFOR | Conc. (%) | FE    | Stability (h) | Selectivity (%) | Reference                                             |
|---------------|------------------------|-----------|---------------------------------|---------------------------------------------------------|---------------------------------|-----------|-------|---------------|-----------------|-------------------------------------------------------|
| Sc-NiFe-LDH   | 10                     | 96.72     | 1.357                           | 802.82                                                  | 1.37                            | 100       | 96.54 | 110           | 99.47           | This work                                             |
| d-NiFe LDH/CP | 10                     | 96.8      | 1.48                            | 15                                                      | 1.64                            | 97.35     | 84.47 | /             | 99.4            | Ind Eng Chem Res, <b>2020</b> , 59: 17348-17356. Nat. |
| InOOH-OV      | 10                     | 92.41     | 1.421                           | 40                                                      | 1.616                           | 98.68     | 90    | 25            | 88.4            | Commun. <b>2023</b> , 14, 2040                        |
| Co-P@NF       | 10                     | 89.8      | 1.392                           | /                                                       | 1.53                            | 100       | /     | 2             | 89.5            | Chem. Eng. J. <b>2023</b> , 469, 143832               |
| VN/NiF        | 10                     | 97        | 1.36                            | 140                                                     | 1.373                           | 99        | 86    | /             | /               | Adv. Funct. Mater. <b>2019</b> , 29, 1904780          |

**Table S2** | Comparison of FDCA yield with several electrochemical HMF catalysts reported recently.

| Catalysts                          | Condition            | E (V vs. RHE)/Current density (mA/cm <sup>2</sup> ) | FE   | Time (h) | Reference                                    |
|------------------------------------|----------------------|-----------------------------------------------------|------|----------|----------------------------------------------|
| Sc-NiFe-LDH                        | 1 M KOH<br>10 mM HMF | 1.50 V/802.8 mA/cm <sup>2</sup>                     | 96.5 | 110      | This work                                    |
| Ni <sub>3</sub> S <sub>2</sub> /NF | 1 M KOH+10<br>mM HMF | 1.423 V/100 mA/cm <sup>2</sup>                      | 98   | /        | J. Am. Chem. Soc. 2016, 138, 13639-13646     |
| Ni <sub>x</sub> B/NF               | 1 M KOH+10<br>mM HMF | 1.45 V/100 mA/cm <sup>2</sup>                       | 100  | /        | Angew. Chem., Int. Ed. 2018, 57, 11460-11464 |
| CoNW/NF                            | 1 M KOH+10<br>mM HMF | 1.764 V/100 mA/cm <sup>2</sup>                      | 96.6 | /        | Green Chem. 2019, 21, 6699-6706              |
| CoO/CoSe <sub>2</sub>              | 1 M KOH+10<br>mM HMF | 1.48 V/100 mA/cm <sup>2</sup>                       | 97.9 | /        | Green Chem. 2020, 22, 843-849                |
| E-CoAl-LDH-NSA                     | 1 M KOH+10<br>mM HMF | 1.59V/100 mA/cm <sup>2</sup>                        | 99.4 | /        | Appl. Catal., B. 2021, 299, 120669           |
| Co <sub>3</sub> O <sub>4</sub> /CF | 1 M KOH+10<br>mM HMF | 1.40 V /100 mA/cm <sup>2</sup>                      | 92.9 | /        | Appl. Catal., B. 2022, 307, 121209           |

| Catalysts                                                          | Condition         | E (V vs. RHE)/Current density (mA/cm <sup>2</sup> ) | FE    | Time (h) | Reference                                        |
|--------------------------------------------------------------------|-------------------|-----------------------------------------------------|-------|----------|--------------------------------------------------|
| Ni(OH) <sub>2</sub> -NiOOH/NiFeP                                   | 1 M KOH+10 mM HMF | 1.437 V /100 mA/cm <sup>2</sup>                     | 94    | /        | Appl. Catal., B. 2022, 311, 121357               |
| Co-NixP@C                                                          | 1 M KOH+10 mM HMF | 1.54 V /100 mA/cm <sup>2</sup>                      | 98.9  | /        | J. Colloid Interface Sci. 2022, 629, 451-460     |
| NiRu NPs                                                           | 1 M KOH+10 mM HMF | 1.5 V /110 mA/cm <sup>2</sup>                       | 99.7  | /        | ACS Sustainable Chem. Eng. 2023, 11, 13441-13450 |
| Co <sub>3</sub> S <sub>4</sub> /Ni <sub>3</sub> S <sub>2</sub>     | 1 M KOH+10 mM HMF | 1.489 V /100 mA/cm <sup>2</sup>                     | 100   | /        | Green Chem. 2023, 25, 8698-8705                  |
| CuH <sub>2</sub> NWs@Ce:<br>NiH <sub>2</sub> NSs/Cu                | 1 M KOH+10 mM HMF | 1.43 V /100 mA/cm <sup>2</sup>                      | 98.0  | 30       | Inorg. Chem. 2023, 62, 12534-12547               |
| NiMo <sub>3</sub> S <sub>4</sub> -R                                | 1 M KOH+10 mM HMF | 1.395 V /100 mA/cm <sup>2</sup>                     | 98.5  | 12       | Appl. Catal., B. 2023, 323, 122126               |
| Co <sub>9</sub> S <sub>8</sub> @Ni <sub>3</sub> S <sub>2</sub> /NF | 1 M KOH+10 mM HMF | 1.46 V /100 mA/cm <sup>2</sup>                      | 89.04 | /        | Mater. Today Nano. 2023, 23, 100373              |
| CoO-Co@C/CF                                                        | 1 M KOH+10 mM HMF | 1.471 V /100 mA/cm <sup>2</sup>                     | 99.4  | 20       | Molecules. 2023, 28, 3040                        |

| <b>Catalysts</b>                             | <b>Condition</b>     | <b>E (V vs. RHE)/Current density<br/>(mA/cm<sup>2</sup>)</b> | <b>FE</b> | <b>Time (h)</b> | <b>Reference</b>                   |
|----------------------------------------------|----------------------|--------------------------------------------------------------|-----------|-----------------|------------------------------------|
| P-Co <sub>3</sub> O <sub>4</sub> -<br>NBA@NF | 1 M KOH+10<br>mM HMF | 1.524 V /100 mA/cm <sup>2</sup>                              | 97.01     | /               | Appl. Catal., A. 2024, 669, 119497 |

**Table S3** | The resistance of each component for Sc-NiFe-LDH in 1 M KOH.

| Potential      | R <sub>s</sub> | R <sub>p</sub>      | R <sub>ct</sub> | CPE1     | CPE2     |
|----------------|----------------|---------------------|-----------------|----------|----------|
| 1.15 V vs. RHE | 0.3342         | 44.9                | 10330           | 0.003889 | 0.00378  |
| 1.20 V vs. RHE | 0.3385         | 28.43               | 2511            | 0.005315 | 0.003971 |
| 1.25 V vs. RHE | 0.3485         | 19.83               | 1117            | 0.01025  | 0.005325 |
| 1.30 V vs. RHE | 0.3517         | 19.71               | 514.4           | 0.007785 | 0.02177  |
| 1.35 V vs. RHE | 0.3296         | 4.236               | 80.01           | 0.01796  | 0.08332  |
| 1.40 V vs. RHE | 0.3012         | 0.6041              | 20.34           | 0.405    | 0.7023   |
| 1.45 V vs. RHE | 0.2902         | 0.01239             | 1.078           | 1        | 0.97     |
| 1.50 V vs. RHE | 0.2840         | 0.01024             | 0.1022          | 1.8417   | 1        |
| 1.55 V vs. RHE | 0.2891         | 0.009233            | 0.08389         | 1        | 0.6787   |
| 1.60 V vs. RHE | 0.2521         | 1*10 <sup>-12</sup> | 0.05324         | 0.3131   | 0.9005   |

**Table S4** | The resistance of each component for Sc-NiFe-LDH in 1 M KOH with 10 M

HMF.

| Potential      | $R_s$  | $R_p$   | $R_{ct}$            | CPE1                | CPE2     |
|----------------|--------|---------|---------------------|---------------------|----------|
| 1.15V vs. RHE  | 0.4096 | 15.8    | $2.629 \times 10^9$ | 0.003907            | 0.004842 |
| 1.20V vs. RHE  | 0.412  | 10.48   | 2331                | 0.006598            | 0.004051 |
| 1.25 V vs. RHE | 0.41   | 5.121   | 975.8               | 0.005165            | 0.01016  |
| 1.30 V vs. RHE | 0.4108 | 3.687   | 383.1               | 0.007383            | 0.01613  |
| 1.35 V vs. RHE | 0.4003 | 1.402   | 95.88               | 0.01225             | 0.02463  |
| 1.40 V vs. RHE | 0.394  | 1.089   | 16.65               | 0.03679             | 0.1019   |
| 1.45 V vs. RHE | 0.3559 | 0.7132  | 6.873               | 0.2368              | 0.872    |
| 1.50 V vs. RHE | 0.3476 | 0.4402  | 0.02964             | 1                   | 0.3404   |
| 1.55 V vs. RHE | 0.2455 | 0.2834  | 0.4876              | $1 \times 10^{-12}$ | 1        |
| 1.60 V vs. RHE | 0.6271 | 0.06972 | 0.4227              | 0.1547              | 1        |



**Table S5** | The resistance of each component for NiFe-LDH in 1 M KOH.

| Potential      | R <sub>s</sub> | R <sub>p</sub> | R <sub>ct</sub>        | CPE1     | CPE2     |
|----------------|----------------|----------------|------------------------|----------|----------|
| 1.15 V vs. RHE | 0.3941         | 179.7          | 5.572*10 <sup>10</sup> | 0.001312 | 0.002968 |
| 1.20 V vs. RHE | 0.3904         | 14.24          | 6239                   | 0.002307 | 0.002861 |
| 1.25 V vs. RHE | 0.3889         | 10.48          | 2869                   | 0.00357  | 0.00149  |
| 1.30 V vs. RHE | 0.392          | 4.203          | 350.9                  | 0.004616 | 0.008771 |
| 1.35 V vs. RHE | 0.3216         | 2.586          | 66.71                  | 0.01914  | 0.06565  |
| 1.40 V vs. RHE | 0.2789         | 0.6035         | 13.42                  | 0.4021   | 1        |
| 1.45 V vs. RHE | 0.2768         | 1.35           | 0.06531                | 1        | 0.6748   |
| 1.50 V vs. RHE | 0.2748         | 0.2853         | 0.06952                | 0.8851   | 0.3722   |
| 1.55 V vs. RHE | 0.2771         | 0.1253         | 0.05063                | 0.7845   | 0.2642   |
| 1.60 V vs. RHE | 0.2851         | 0.04092        | 0.08101                | 0.2267   | 0.7646   |

**Table S6** | The resistance of each component for NiFe-LDH in 1 M KOH with 10 M HMF.

| Potential      | R <sub>s</sub> | R <sub>p</sub> | R <sub>ct</sub>        | CPE1     | CPE2     |
|----------------|----------------|----------------|------------------------|----------|----------|
| 1.15 V vs. RHE | 0.4069         | 79.27          | 2.479*10 <sup>10</sup> | 0.002392 | 0.005983 |
| 1.20 V vs. RHE | 0.4178         | 10.55          | 1753                   | 0.002043 | 0.007201 |
| 1.25 V vs. RHE | 0.4162         | 5.668          | 711.9                  | 0.00254  | 0.01042  |
| 1.30 V vs. RHE | 0.4094         | 3.123          | 251.1                  | 0.003964 | 0.01715  |
| 1.35 V vs. RHE | 0.3967         | 1.862          | 68.75                  | 0.008578 | 0.03028  |
| 1.40 V vs. RHE | 0.3708         | 1.203          | 1.914                  | 0.3168   | 0.0823   |
| 1.45 V vs. RHE | 0.3118         | 0.06084        | 1.801                  | 0.4673   | 1        |
| 1.50 V vs. RHE | 0.3181         | 0.08432        | 0.4478                 | 0.2844   | 1        |
| 1.55 V vs. RHE | 0.06071        | 0.08432        | 0.4478                 | 0.1745   | 1        |

s
